# Supplementary material
Source: publisher site journal article supplement (https://www.dovepress.com/article/354349)
Supplement: Supplementary file 1 [file get_supplementary_file.php]

Supplementary Table 1: 200 inflammation-related genes

| Gene Symbol | Gene Description                                                          |
|-------------|---------------------------------------------------------------------------|
| ABCA1       | ATP binding cassette subfamily A member 1                                 |
| ABI1        | abl interactor 1                                                          |
| ACVR1B      | activin A receptor type 1B                                                |
| ACVR2A      | activin A receptor type 2A                                                |
| ADM         | adrenomedullin                                                            |
| ADORA2B     | adenosine A2b receptor                                                    |
| ADRM1       | adhesion regulating molecule 1                                            |
| AHR         | aryl hydrocarbon receptor                                                 |
| APLNR       | apelin receptor                                                           |
| AQP9        | aquaporin 9                                                               |
| ATP2A2      | ATPase sarcoplasmic/endoplasmic reticulum Ca <sup>2+</sup> transporting 2 |
| ATP2B1      | ATPase plasma membrane Ca <sup>2+</sup> transporting 1                    |
| ATP2C1      | ATPase secretory pathway Ca <sup>2+</sup> transporting 1                  |
| AXL         | AXL receptor tyrosine kinase                                              |
| BDKRB1      | bradykinin receptor B1                                                    |
| BEST1       | bestrophin 1                                                              |
| BST2        | bone marrow stromal cell antigen 2                                        |
| BTG2        | BTG anti-proliferation factor 2                                           |
| C3AR1       | complement C3a receptor 1                                                 |
| C5AR1       | complement C5a receptor 1                                                 |
| CALCRL      | calcitonin receptor like receptor                                         |
| CCL17       | C-C motif chemokine ligand 17                                             |
| CCL2        | C-C motif chemokine ligand 2                                              |
| CCL20       | C-C motif chemokine ligand 20                                             |
| CCL22       | C-C motif chemokine ligand 22                                             |
| CCL24       | C-C motif chemokine ligand 24                                             |
| CCL5        | C-C motif chemokine ligand 5                                              |
| CCL7        | C-C motif chemokine ligand 7                                              |
| CCR7        | C-C motif chemokine receptor 7                                            |
| CCRL2       | C-C motif chemokine receptor like 2                                       |
| CD14        | CD14 molecule                                                             |
| CD40        | CD40 molecule                                                             |
| CD48        | CD48 molecule                                                             |
| CD55        | CD55 molecule (Cromer blood group)                                        |
| CD69        | CD69 molecule                                                             |
| CD70        | CD70 molecule                                                             |
| CD82        | CD82 molecule                                                             |
| CDKN1A      | cyclin dependent kinase inhibitor 1A                                      |
| CHST2       | carbohydrate sulfotransferase 2                                           |
| CLEC5A      | C-type lectin domain containing 5A                                        |
| CMKLR1      | chemerin chemokine-like receptor 1                                        |

|         |                                                           |
|---------|-----------------------------------------------------------|
| CSF1    | colony stimulating factor 1                               |
| CSF3    | colony stimulating factor 3                               |
| CSF3R   | colony stimulating factor 3 receptor                      |
| CX3CL1  | C-X3-C motif chemokine ligand 1                           |
| CXCL10  | C-X-C motif chemokine ligand 10                           |
| CXCL11  | C-X-C motif chemokine ligand 11                           |
| CXCL6   | C-X-C motif chemokine ligand 6                            |
| CXCL9   | C-X-C motif chemokine ligand 9                            |
| CXCR6   | C-X-C motif chemokine receptor 6                          |
| CYBB    | cytochrome b-245 beta chain                               |
| DCBLD2  | discoidin, CUB and LCCL domain containing 2               |
| EBI3    | Epstein-Barr virus induced 3                              |
| EDN1    | endothelin 1                                              |
| EIF2AK2 | eukaryotic translation initiation factor 2 alpha kinase 2 |
| EMP3    | epithelial membrane protein 3                             |
| ADGRE1  | adhesion G protein-coupled receptor E1                    |
| EREG    | epiregulin                                                |
| F3      | coagulation factor III, tissue factor                     |
| FFAR2   | free fatty acid receptor 2                                |
| FPR1    | formyl peptide receptor 1                                 |
| FZD5    | frizzled class receptor 5                                 |
| GABBR1  | gamma-aminobutyric acid type B receptor subunit 1         |
| GCH1    | GTP cyclohydrolase 1                                      |
| GNA15   | G protein subunit alpha 15                                |
| GNAI3   | G protein subunit alpha i3                                |
| GP1BA   | glycoprotein Ib platelet subunit alpha                    |
| GPC3    | glypican 3                                                |
| GPR132  | G protein-coupled receptor 132                            |
| GPR183  | G protein-coupled receptor 183                            |
| HAS2    | hyaluronan synthase 2                                     |
| HBEGF   | heparin binding EGF like growth factor                    |
| HIF1A   | hypoxia inducible factor 1 subunit alpha                  |
| HPN     | hepsin                                                    |
| HRH1    | histamine receptor H1                                     |
| ICAM1   | intercellular adhesion molecule 1                         |
| ICAM4   | intercellular adhesion molecule 4                         |
| ICOSLG  | inducible T cell costimulator ligand                      |
| IFITM1  | interferon induced transmembrane protein...               |
| IFNAR1  | interferon alpha and beta receptor subun...               |
| IFNGR2  | interferon gamma receptor 2                               |
| IL10    | interleukin 10                                            |
| IL10RA  | interleukin 10 receptor subunit alpha                     |
| IL12B   | interleukin 12B                                           |

|         |                                                                           |
|---------|---------------------------------------------------------------------------|
| IL15    | interleukin 15                                                            |
| IL15RA  | interleukin 15 receptor subunit alpha                                     |
| IL18    | interleukin 18                                                            |
| IL18R1  | interleukin 18 receptor 1                                                 |
| IL18RAP | interleukin 18 receptor accessory protein                                 |
| IL1A    | interleukin 1 alpha                                                       |
| IL1B    | interleukin 1 beta                                                        |
| IL1R1   | interleukin 1 receptor type 1                                             |
| IL2RB   | interleukin 2 receptor subunit beta                                       |
| IL4R    | interleukin 4 receptor                                                    |
| IL6     | interleukin 6                                                             |
| IL7R    | interleukin 7 receptor                                                    |
| CXCL8   | C-X-C motif chemokine ligand 8                                            |
| INHBA   | inhibin subunit beta A                                                    |
| IRAK2   | interleukin 1 receptor associated kinase 2                                |
| IRF1    | interferon regulatory factor 1                                            |
| IRF7    | interferon regulatory factor 7                                            |
| ITGA5   | integrin subunit alpha 5                                                  |
| ITGB3   | integrin subunit beta 3                                                   |
| ITGB8   | integrin subunit beta 8                                                   |
| KCNA3   | potassium voltage-gated channel subfamily A member 3                      |
| KCNJ2   | potassium inwardly rectifying channel subfamily J member 2                |
| KCNMB2  | potassium calcium-activated channel subfamily M regulatory beta subunit 2 |
| KIF1B   | kinesin family member 1B                                                  |
| KLF6    | Kruppel like factor 6                                                     |
| LAMP3   | lysosomal associated membrane protein 3                                   |
| LCK     | LCK proto-oncogene, Src family tyrosine kinase                            |
| LCP2    | lymphocyte cytosolic protein 2                                            |
| LDLR    | low density lipoprotein receptor                                          |
| LIF     | LIF interleukin 6 family cytokine                                         |
| LPAR1   | lysophosphatidic acid receptor 1                                          |
| LTA     | lymphotoxin alpha                                                         |
| LY6E    | lymphocyte antigen 6 family member E                                      |
| LYN     | LYN proto-oncogene, Src family tyrosine kinase                            |
| MARCO   | macrophage receptor with collagenous structure                            |
| MEFV    | MEFV innate immunity regulator, pyrin                                     |
| MEP1A   | mepirin A subunit alpha                                                   |
| MET     | MET proto-oncogene, receptor tyrosine kinase                              |
| MMP14   | matrix metalloproteinase 14                                               |
| MSR1    | macrophage scavenger receptor 1                                           |
| MXD1    | MAX dimerization protein 1                                                |
| MYC     | MYC proto-oncogene, bHLH transcription factor                             |

|         |                                                        |
|---------|--------------------------------------------------------|
| NAMPT   | nicotinamide phosphoribosyltransferase                 |
| NDP     | norrin cystine knot growth factor NDP                  |
| NFKB1   | nuclear factor kappa B subunit 1                       |
| NFKBIA  | NFKB inhibitor alpha                                   |
| NLRP3   | NLR family pyrin domain containing 3                   |
| NMI     | N-myc and STAT interactor                              |
| NMUR1   | neuromedin U receptor 1                                |
| NOD2    | nucleotide binding oligomerization domain containing 2 |
| NPFFR2  | neuropeptide FF receptor 2                             |
| OLR1    | oxidized low density lipoprotein receptor 1            |
| OPRK1   | opioid receptor kappa 1                                |
| OSM     | oncostatin M                                           |
| OSMR    | oncostatin M receptor                                  |
| P2RX4   | purinergic receptor P2X 4                              |
| P2RX7   | purinergic receptor P2X 7                              |
| P2RY2   | purinergic receptor P2Y2                               |
| PCDH7   | protocadherin 7                                        |
| PDE4B   | phosphodiesterase 4B                                   |
| PDPN    | podoplanin                                             |
| PIK3R5  | phosphoinositide-3-kinase regulatory subunit 5         |
| PLAUR   | plasminogen activator, urokinase receptor              |
| PROK2   | prokineticin 2                                         |
| PSEN1   | presenilin 1                                           |
| PTAFR   | platelet activating factor receptor                    |
| PTGER2  | prostaglandin E receptor 2                             |
| PTGER4  | prostaglandin E receptor 4                             |
| PTGIR   | prostaglandin I2 receptor                              |
| PTPRE   | protein tyrosine phosphatase receptor type E           |
| PVR     | PVR cell adhesion molecule                             |
| RAF1    | Raf-1 proto-oncogene, serine/threonine kinase          |
| RASGRP1 | RAS guanyl releasing protein 1                         |
| RELA    | RELA proto-oncogene, NF-kB subunit                     |
| RGS1    | regulator of G protein signaling 1                     |
| RGS16   | regulator of G protein signaling 16                    |
| RHOG    | ras homolog family member G                            |
| RIPK2   | receptor interacting serine/threonine kinase 2         |
| RNF144B | ring finger protein 144B                               |
| ROS1    | ROS proto-oncogene 1, receptor tyrosine kinase         |
| RTP4    | receptor transporter protein 4                         |
| SCARF1  | scavenger receptor class F member 1                    |
| SCN1B   | sodium voltage-gated channel beta subunit 1            |
| SELE    | selectin E                                             |
| SELL    | selectin L                                             |

|          |                                                           |
|----------|-----------------------------------------------------------|
| SELENOS  | selenoprotein S                                           |
| SEMA4D   | semaphorin 4D                                             |
| SERPINE1 | serpin family E member 1                                  |
| SGMS2    | sphingomyelin synthase 2                                  |
| SLAMF1   | signaling lymphocytic activation molecule family member 1 |
| SLC11A2  | solute carrier family 11 member 2                         |
| SLC1A2   | solute carrier family 1 member 2                          |
| SLC28A2  | solute carrier family 28 member 2                         |
| SLC31A1  | solute carrier family 31 member 1                         |
| SLC31A2  | solute carrier family 31 member 2                         |
| SLC4A4   | solute carrier family 4 member 4                          |
| SLC7A1   | solute carrier family 7 member 1                          |
| SLC7A2   | solute carrier family 7 member 2                          |
| SPHK1    | sphingosine kinase 1                                      |
| SRI      | sorcin                                                    |
| STAB1    | stabilin 1                                                |
| TACR1    | tachykinin receptor 1                                     |
| TACR3    | tachykinin receptor 3                                     |
| TAPBP    | TAP binding protein                                       |
| TIMP1    | TIMP metalloproteinase inhibitor 1                        |
| TLR1     | toll like receptor 1                                      |
| TLR2     | toll like receptor 2                                      |
| TLR3     | toll like receptor 3                                      |
| TNFAIP6  | TNF alpha induced protein 6                               |
| TNFRSF1B | TNF receptor superfamily member 1B                        |
| TNFRSF9  | TNF receptor superfamily member 9                         |
| TNFSF10  | TNF superfamily member 10                                 |
| TNFSF15  | TNF superfamily member 15                                 |
| TNFSF9   | TNF superfamily member 9                                  |
| TPBG     | trophoblast glycoprotein                                  |
| VIP      | vasoactive intestinal peptide                             |

Supplementary Table 2: 120 differentially expressed inflammation-related genes(DEIRGs)

| gene     | conMean     | treatMean   | logFC        | pValue      | fdr         |
|----------|-------------|-------------|--------------|-------------|-------------|
| TNFAIP6  | 4.023591104 | 6.793714739 | 0.755716943  | 3.69E-09    | 1.43E-08    |
| TNFRSF1B | 8.170990438 | 12.91355308 | 0.660303134  | 0.000222597 | 0.000370237 |
| CHST2    | 2.274756481 | 14.14540333 | 2.636549299  | 6.50E-19    | 1.51E-17    |
| PDPN     | 8.287815022 | 40.22280246 | 2.278949894  | 8.84E-18    | 1.31E-16    |
| BST2     | 37.59415163 | 254.8219261 | 2.760909269  | 1.32E-18    | 2.38E-17    |
| HAS2     | 1.282884894 | 3.222615868 | 1.3288405    | 2.36E-07    | 6.00E-07    |
| APLNR    | 3.577749646 | 3.896703569 | 0.123201749  | 0.002287809 | 0.003485166 |
| EBI3     | 1.099020219 | 1.800783169 | 0.71240655   | 0.003943435 | 0.005790811 |
| TAPBP    | 36.14949448 | 72.34454533 | 1.000908771  | 4.36E-14    | 3.56E-13    |
| IL2RB    | 2.549397998 | 5.022930387 | 0.978372664  | 0.000893267 | 0.001400024 |
| NFKBIA   | 60.4203241  | 88.38688349 | 0.548798368  | 0.000102655 | 0.000185919 |
| IFNGR2   | 30.03494403 | 40.17691583 | 0.419724845  | 4.33E-06    | 9.41E-06    |
| AXL      | 4.970895254 | 10.94572929 | 1.138790473  | 6.41E-07    | 1.56E-06    |
| PTPRE    | 2.009928526 | 2.975594272 | 0.566033627  | 1.03E-05    | 2.10E-05    |
| CSF3R    | 0.514011599 | 0.94955341  | 0.885448235  | 1.76E-06    | 3.98E-06    |
| LY6E     | 67.89279952 | 210.4707396 | 1.632289198  | 2.98E-15    | 2.70E-14    |
| GABBR1   | 0.705131916 | 1.794162836 | 1.347345747  | 5.64E-11    | 2.96E-10    |
| STAB1    | 3.634811421 | 4.688755168 | 0.367324431  | 0.000628934 | 0.001025163 |
| CCL5     | 11.75423453 | 49.91616825 | 2.086326602  | 7.49E-10    | 3.13E-09    |
| LCK      | 1.877487347 | 3.744736993 | 0.996061211  | 6.21E-05    | 0.000117636 |
| MMP14    | 43.35374483 | 143.1399386 | 1.723197745  | 2.06E-21    | 1.12E-19    |
| SCARF1   | 1.021294951 | 1.409922309 | 0.46521609   | 0.000118915 | 0.000210686 |
| CXCR6    | 0.92893614  | 1.778485825 | 0.93699815   | 0.005127107 | 0.007330864 |
| CXCL11   | 2.023297441 | 24.77895837 | 3.614335214  | 8.62E-11    | 4.39E-10    |
| MXD1     | 29.44128836 | 17.88818528 | -0.71883377  | 0.004240022 | 0.006170746 |
| MET      | 6.427219495 | 16.07803492 | 1.322824441  | 1.98E-13    | 1.53E-12    |
| INHBA    | 1.020755071 | 18.81179203 | 4.203928647  | 4.19E-22    | 3.41E-20    |
| SEMA4D   | 3.532183597 | 2.866231921 | -0.301404984 | 0.000807956 | 0.001278611 |
| ICAM1    | 11.2802693  | 25.09004903 | 1.15331378   | 1.12E-08    | 3.81E-08    |
| RTP4     | 3.363958205 | 10.01168951 | 1.573453769  | 5.78E-10    | 2.48E-09    |
| TNFSF10  | 37.08433579 | 85.9844309  | 1.213265527  | 3.80E-08    | 1.15E-07    |
| ITGA5    | 4.903081711 | 28.72014193 | 2.550302169  | 9.95E-21    | 4.05E-19    |
| CYBB     | 4.164319817 | 8.675341407 | 1.058839663  | 0.000130017 | 0.000227879 |
| ADRM1    | 47.94752018 | 76.4485376  | 0.673032702  | 3.41E-17    | 4.27E-16    |
| TNFRSF9  | 0.219870279 | 1.010963942 | 2.201007034  | 2.05E-15    | 1.96E-14    |
| BTG2     | 79.8841461  | 41.32515389 | -0.950889021 | 5.96E-07    | 1.47E-06    |
| SERPINE1 | 15.19701211 | 128.4947971 | 3.079850336  | 8.58E-19    | 1.75E-17    |
| MEFV     | 0.1925862   | 0.623021533 | 1.693777698  | 2.28E-11    | 1.28E-10    |
| SELENOS  | 12.36411848 | 15.28738906 | 0.306182645  | 8.67E-05    | 0.000160587 |
| OSMR     | 9.574034632 | 17.10225781 | 0.83698787   | 4.38E-08    | 1.30E-07    |
| AQP9     | 0.596546008 | 1.639542057 | 1.458587596  | 2.60E-11    | 1.41E-10    |

|         |             |             |              |             |             |
|---------|-------------|-------------|--------------|-------------|-------------|
| AHR     | 11.56017532 | 21.65150703 | 0.905304168  | 3.14E-08    | 9.65E-08    |
| RIPK2   | 3.637029082 | 7.719924182 | 1.085826217  | 3.22E-19    | 8.75E-18    |
| TLR3    | 2.377005913 | 1.523662638 | -0.641601989 | 2.45E-06    | 5.39E-06    |
| HIF1A   | 32.81321935 | 67.25712477 | 1.03540996   | 2.96E-12    | 1.79E-11    |
| TPBG    | 4.272656621 | 13.64370615 | 1.675030306  | 4.07E-22    | 3.41E-20    |
| ADGRE1  | 0.139950561 | 0.832892581 | 2.573213174  | 4.26E-10    | 1.93E-09    |
| OLR1    | 0.72531218  | 3.271168987 | 2.173132309  | 3.09E-10    | 1.44E-09    |
| OSM     | 0.910053515 | 2.765669367 | 1.603605405  | 8.59E-08    | 2.37E-07    |
| IL18R1  | 0.564571505 | 1.076870833 | 0.931616993  | 4.46E-06    | 9.56E-06    |
| IL1B    | 3.710741156 | 13.13313157 | 1.823431691  | 1.01E-06    | 2.36E-06    |
| IL10RA  | 1.959122581 | 3.195310276 | 0.70574836   | 0.005271324 | 0.007471529 |
| KLF6    | 50.31097808 | 32.48754088 | -0.630986693 | 7.74E-06    | 1.60E-05    |
| CCL7    | 0.189279009 | 0.657646983 | 1.796798949  | 1.88E-09    | 7.64E-09    |
| IFITM1  | 60.17650677 | 173.7079465 | 1.529391488  | 2.39E-10    | 1.18E-09    |
| PIK3R5  | 0.654109125 | 1.00858957  | 0.624735964  | 0.004334222 | 0.006252019 |
| GPR132  | 0.657003366 | 1.439883371 | 1.131979292  | 5.97E-09    | 2.16E-08    |
| C5AR1   | 3.022028663 | 4.832092857 | 0.677130835  | 9.28E-08    | 2.49E-07    |
| IRF1    | 8.443791234 | 14.27488461 | 0.757516269  | 0.000221726 | 0.000370237 |
| TIMP1   | 95.74281097 | 128.9646335 | 0.429739415  | 5.44E-05    | 0.000104391 |
| PVR     | 7.354068228 | 15.80491954 | 1.103759224  | 5.20E-18    | 8.47E-17    |
| IL15    | 0.399162717 | 0.875200415 | 1.132636448  | 4.88E-06    | 1.03E-05    |
| RGS1    | 5.591783845 | 10.67202886 | 0.932453975  | 0.000352521 | 0.000580414 |
| IL1A    | 4.341700417 | 22.19287463 | 2.353764464  | 9.04E-09    | 3.13E-08    |
| ABCA1   | 2.794435315 | 5.630852747 | 1.010796643  | 2.36E-08    | 7.54E-08    |
| CCL2    | 34.96863862 | 11.59628609 | -1.592398799 | 5.05E-09    | 1.87E-08    |
| SELL    | 1.951093976 | 4.381063211 | 1.166997762  | 8.28E-05    | 0.000155193 |
| CCRL2   | 0.349554276 | 0.735188749 | 1.072598206  | 2.71E-08    | 8.48E-08    |
| EMP3    | 11.09943286 | 28.18445604 | 1.344413762  | 3.13E-13    | 2.22E-12    |
| ACVR2A  | 2.660063756 | 1.844448955 | -0.528270961 | 8.55E-08    | 2.37E-07    |
| CCL17   | 2.408247107 | 1.721137934 | -0.484620711 | 0.00548611  | 0.007643041 |
| CMKLR1  | 1.081589924 | 2.028397681 | 0.907186913  | 0.000111409 | 0.000199557 |
| SGMS2   | 5.659837292 | 3.88531921  | -0.542727447 | 5.13E-05    | 9.95E-05    |
| P2RX4   | 1.227214357 | 1.97966857  | 0.689871653  | 7.18E-09    | 2.54E-08    |
| ATP2C1  | 9.10995502  | 18.69374577 | 1.037039843  | 2.42E-17    | 3.29E-16    |
| PLAUR   | 6.597744451 | 16.08680091 | 1.28583265   | 2.62E-13    | 1.94E-12    |
| TNFSF15 | 1.122755381 | 0.587465174 | -0.934468403 | 0.002349286 | 0.003545682 |
| CXCL8   | 13.85514713 | 50.94190453 | 1.878430867  | 1.02E-07    | 2.68E-07    |
| CLEC5A  | 0.720912629 | 1.060225852 | 0.556475295  | 0.005832    | 0.008056068 |
| ITGB8   | 3.570443089 | 5.613889925 | 0.652897654  | 0.000219132 | 0.000370237 |
| SLC11A2 | 7.453325156 | 4.550495715 | -0.711860484 | 2.25E-08    | 7.49E-08    |
| DCBLD2  | 1.967663394 | 6.623144282 | 1.751032845  | 1.21E-16    | 1.41E-15    |
| IL15RA  | 2.657846831 | 5.833890421 | 1.134200322  | 1.36E-12    | 8.85E-12    |
| CCR7    | 1.526339303 | 2.867334111 | 0.909634315  | 0.00619743  | 0.008488917 |

|         |              |              |               |              |              |
|---------|--------------|--------------|---------------|--------------|--------------|
| LCP2    | 1. 65515241  | 3. 102916286 | 0. 906660705  | 8. 89E-05    | 0. 000162774 |
| CCL20   | 6. 801435527 | 22. 88342468 | 1. 750391796  | 1. 12E-06    | 2. 58E-06    |
| LYN     | 7. 19618671  | 9. 2127068   | 0. 35639248   | 0. 00073557  | 0. 00117547  |
| P2RY2   | 13. 26340701 | 7. 845562128 | -0. 757502688 | 2. 31E-06    | 5. 15E-06    |
| EIF2AK2 | 3. 798837428 | 10. 21952629 | 1. 427698446  | 5. 47E-20    | 1. 78E-18    |
| MSR1    | 0. 875197814 | 1. 912542105 | 1. 127810469  | 5. 33E-08    | 1. 55E-07    |
| CD40    | 6. 832223398 | 11. 90615958 | 0. 801281082  | 3. 68E-05    | 7. 32E-05    |
| TLR2    | 4. 651134259 | 7. 525664711 | 0. 69423643   | 9. 33E-08    | 2. 49E-07    |
| SPHK1   | 7. 077902651 | 17. 81970184 | 1. 332079374  | 5. 07E-16    | 5. 51E-15    |
| SLC7A2  | 4. 076554643 | 2. 306054512 | -0. 821923736 | 6. 03E-08    | 1. 72E-07    |
| SRI     | 11. 30776574 | 13. 74417786 | 0. 281506711  | 0. 001767097 | 0. 002717329 |
| PSEN1   | 6. 961063763 | 9. 161389887 | 0. 396258698  | 1. 57E-07    | 4. 07E-07    |
| ADM     | 23. 19667897 | 46. 96694003 | 1. 017727331  | 8. 07E-07    | 1. 91E-06    |
| RELA    | 17. 2216998  | 21. 74284457 | 0. 336313152  | 7. 19E-07    | 1. 72E-06    |
| ATP2B1  | 3. 386861087 | 7. 0161996   | 1. 050740975  | 4. 63E-10    | 2. 04E-09    |
| CD70    | 0. 308391571 | 2. 875481668 | 3. 220968399  | 1. 20E-15    | 1. 23E-14    |
| LAMP3   | 4. 633439412 | 16. 70546298 | 1. 850164554  | 1. 81E-12    | 1. 13E-11    |
| NMI     | 5. 461266126 | 11. 42165363 | 1. 064464174  | 4. 48E-15    | 3. 84E-14    |
| CXCL10  | 15. 19685214 | 125. 1340382 | 3. 041629855  | 2. 65E-10    | 1. 27E-09    |
| CDKN1A  | 91. 19720324 | 114. 5771813 | 0. 329258265  | 0. 006928228 | 0. 009410843 |
| PCDH7   | 2. 289616072 | 5. 737558468 | 1. 325331246  | 4. 85E-05    | 9. 53E-05    |
| RAF1    | 12. 84577947 | 10. 65078459 | -0. 270334724 | 2. 34E-08    | 7. 54E-08    |
| PTAFR   | 6. 171843884 | 8. 216519948 | 0. 41282591   | 0. 003918557 | 0. 005790811 |
| IRF7    | 10. 22077315 | 24. 69192722 | 1. 272535111  | 5. 85E-13    | 3. 97E-12    |
| IFNAR1  | 8. 856275884 | 10. 04182739 | 0. 181249762  | 0. 00548611  | 0. 007643041 |
| RHOG    | 32. 81732166 | 42. 27302262 | 0. 365279772  | 6. 36E-06    | 1. 33E-05    |
| TNFSF9  | 2. 768381458 | 5. 592987983 | 1. 014576484  | 2. 55E-07    | 6. 40E-07    |
| LIF     | 1. 900497686 | 2. 816737116 | 0. 567647656  | 0. 00276905  | 0. 004140873 |
| NAMPT   | 26. 32116373 | 22. 34353407 | -0. 236365881 | 0. 000204161 | 0. 000350297 |
| IL7R    | 2. 277641905 | 8. 053010016 | 1. 821987186  | 1. 36E-11    | 7. 90E-11    |
| IL4R    | 19. 04350893 | 25. 28788282 | 0. 409146923  | 0. 000915862 | 0. 001421767 |
| CXCL9   | 9. 240069676 | 49. 68572043 | 2. 426855648  | 3. 81E-09    | 1. 44E-08    |
| ADORA2B | 5. 214778891 | 8. 314712014 | 0. 673060212  | 1. 58E-05    | 3. 17E-05    |
| PTGIR   | 0. 37947236  | 0. 784628867 | 1. 048015609  | 2. 78E-09    | 1. 10E-08    |
| KCNJ2   | 2. 062118215 | 1. 585372007 | -0. 379305632 | 0. 000669246 | 0. 001080071 |
| C3AR1   | 2. 70393565  | 4. 78111131  | 0. 822285176  | 0. 000132673 | 0. 00023006  |



Supplementary Table 3: 32 DEIRGs significantly related with OS for HNSCC patients

| id       | HR          | HR.95L      | HR.95H      | pvalue      |
|----------|-------------|-------------|-------------|-------------|
| TNFAIP6  | 1.131677067 | 1.003443642 | 1.276297869 | 0.04380105  |
| TNFRSF1B | 0.83850281  | 0.736718172 | 0.954349965 | 0.007639157 |
| IL2RB    | 0.872751146 | 0.768218249 | 0.99150803  | 0.036529539 |
| CCL5     | 0.899244433 | 0.82464176  | 0.980596169 | 0.016243163 |
| LCK      | 0.767189161 | 0.660695924 | 0.890847344 | 0.000509194 |
| MMP14    | 1.209886563 | 1.026413209 | 1.426156135 | 0.023167139 |
| CXCR6    | 0.733211934 | 0.610883359 | 0.880036641 | 0.000861714 |
| MET      | 1.197588352 | 1.028670882 | 1.394243667 | 0.020106275 |
| INHBA    | 1.144818723 | 1.0483364   | 1.250180676 | 0.002605438 |
| SEMA4D   | 0.815910446 | 0.671339178 | 0.991614788 | 0.040895608 |
| ITGA5    | 1.238927894 | 1.097608791 | 1.398442086 | 0.000526003 |
| SERPINE1 | 1.135400668 | 1.043737527 | 1.235113851 | 0.003109573 |
| SELENOS  | 1.426006213 | 1.049329352 | 1.937898444 | 0.023350691 |
| ADGRE1   | 1.30348609  | 1.087592345 | 1.562236066 | 0.004120119 |
| OLR1     | 1.196532058 | 1.074088039 | 1.332934467 | 0.001123748 |
| IL10RA   | 0.807132722 | 0.692944843 | 0.940137209 | 0.005902873 |
| PIK3R5   | 0.750625149 | 0.573870377 | 0.981821221 | 0.036270421 |
| GPR132   | 0.774085079 | 0.605432826 | 0.989717908 | 0.041112202 |
| TIMP1    | 1.133761941 | 1.00268976  | 1.281967953 | 0.045196896 |
| PVR      | 1.386705107 | 1.13585932  | 1.692948255 | 0.001321684 |
| IL1A     | 1.096925748 | 1.012765916 | 1.188079178 | 0.023121587 |
| SELL     | 0.831970868 | 0.736194024 | 0.940208019 | 0.003198422 |
| CXCL8    | 1.081874348 | 1.001913299 | 1.168216956 | 0.044563031 |
| DCBLD2   | 1.168743763 | 1.001241142 | 1.364268732 | 0.048191039 |
| CCR7     | 0.717325251 | 0.617897207 | 0.832752616 | 1.28E-05    |
| SRI      | 1.32164509  | 1.029710047 | 1.696347189 | 0.028534298 |
| PSEN1    | 1.568634866 | 1.073926174 | 2.291233237 | 0.01986395  |
| ADM      | 1.140535365 | 1.01005319  | 1.287873681 | 0.03389378  |
| LIF      | 1.177241786 | 1.043873474 | 1.327649622 | 0.007816379 |
| NAMPT    | 1.139276052 | 1.00234783  | 1.294909694 | 0.045949284 |
| CXCL9    | 0.934519523 | 0.87683715  | 0.995996508 | 0.037217368 |
| PTGIR    | 0.692492847 | 0.495231167 | 0.968328277 | 0.031705163 |

Supplementary Table 4: Seven DEIRGs identified as hub genes.

| id     | coef         | HR          | HR. 95L     | HR. 95H     | pvalue      |
|--------|--------------|-------------|-------------|-------------|-------------|
| ADGRE1 | 0.283652396  | 1.327971242 | 1.097283633 | 1.607157499 | 0.003573426 |
| OLR1   | 0.146692989  | 1.15799839  | 1.025038023 | 1.308205394 | 0.018404738 |
| GPR132 | -0.292147311 | 0.746658537 | 0.538711446 | 1.03487493  | 0.079407576 |
| TIMP1  | 0.156693619  | 1.169637205 | 1.015440918 | 1.347248439 | 0.029825429 |
| CCR7   | -0.327125056 | 0.720993573 | 0.598511693 | 0.868540646 | 0.000573915 |
| PSEN1  | 0.40113637   | 1.493520926 | 1.006021061 | 2.217254533 | 0.046619534 |
| NAMPT  | 0.127155137  | 1.135593177 | 0.995926816 | 1.29484601  | 0.057563363 |

Supplementary Table 5: Univariate Cox analysis

| id        | HR          | HR. 95L     | HR. 95H     | pvalue      |
|-----------|-------------|-------------|-------------|-------------|
| Age       | 1.020625213 | 1.007995712 | 1.033412953 | 0.001311053 |
| Sex       | 0.75052041  | 0.563327368 | 0.999917488 | 0.049934146 |
| Grade     | 0.940858216 | 0.688962882 | 1.284850325 | 0.701386182 |
| Stage     | 1.066767218 | 0.476600691 | 2.387726914 | 0.87506721  |
| Stage     | 1.223460249 | 0.550414223 | 2.719506362 | 0.620686866 |
| Stage     | 1.307170462 | 0.609831594 | 2.801912256 | 0.491082334 |
| M         | 4.782607563 | 1.761374668 | 12.98607021 | 0.00213543  |
| N         | 1.06479165  | 0.732091012 | 1.548688945 | 0.742575927 |
| N         | 1.380848562 | 1.014309869 | 1.879842453 | 0.040341389 |
| N         | 1.71404941  | 0.629841445 | 4.664611079 | 0.291455153 |
| T         | 1.092426919 | 0.571890931 | 2.086755548 | 0.788922553 |
| T         | 1.445607125 | 0.760900327 | 2.746456906 | 0.2603915   |
| T         | 1.248467934 | 0.664916315 | 2.344162938 | 0.489952797 |
| riskScore | 1.777390642 | 1.53955377  | 2.051969576 | 4.26E-15    |

Supplementary Table 6: Univariate Cox analysis

| id        | HR          | HR. 95L     | HR. 95H     | pvalue      |
|-----------|-------------|-------------|-------------|-------------|
| riskScore | 1.799044012 | 1.548662074 | 2.089906772 | 1.59E-14    |
| Age       | 1.020333671 | 1.006816831 | 1.034031979 | 0.003092206 |
| SexMale   | 0.776125808 | 0.569877924 | 1.057018082 | 0.107810036 |
| MM1       | 4.909388953 | 1.776866673 | 13.56438289 | 0.002150759 |
| NN1       | 1.042824099 | 0.707290292 | 1.537532911 | 0.832352329 |
| NN2       | 1.534568149 | 1.116489327 | 2.109200104 | 0.008315647 |
| NN3       | 1.974042133 | 0.709855541 | 5.489627281 | 0.192487918 |
